# Supplementary material
Source: MDPI journal article supplement (https://www.mdpi.com/1424-8247/15/2/132)
Supplement: s1 [file s1]

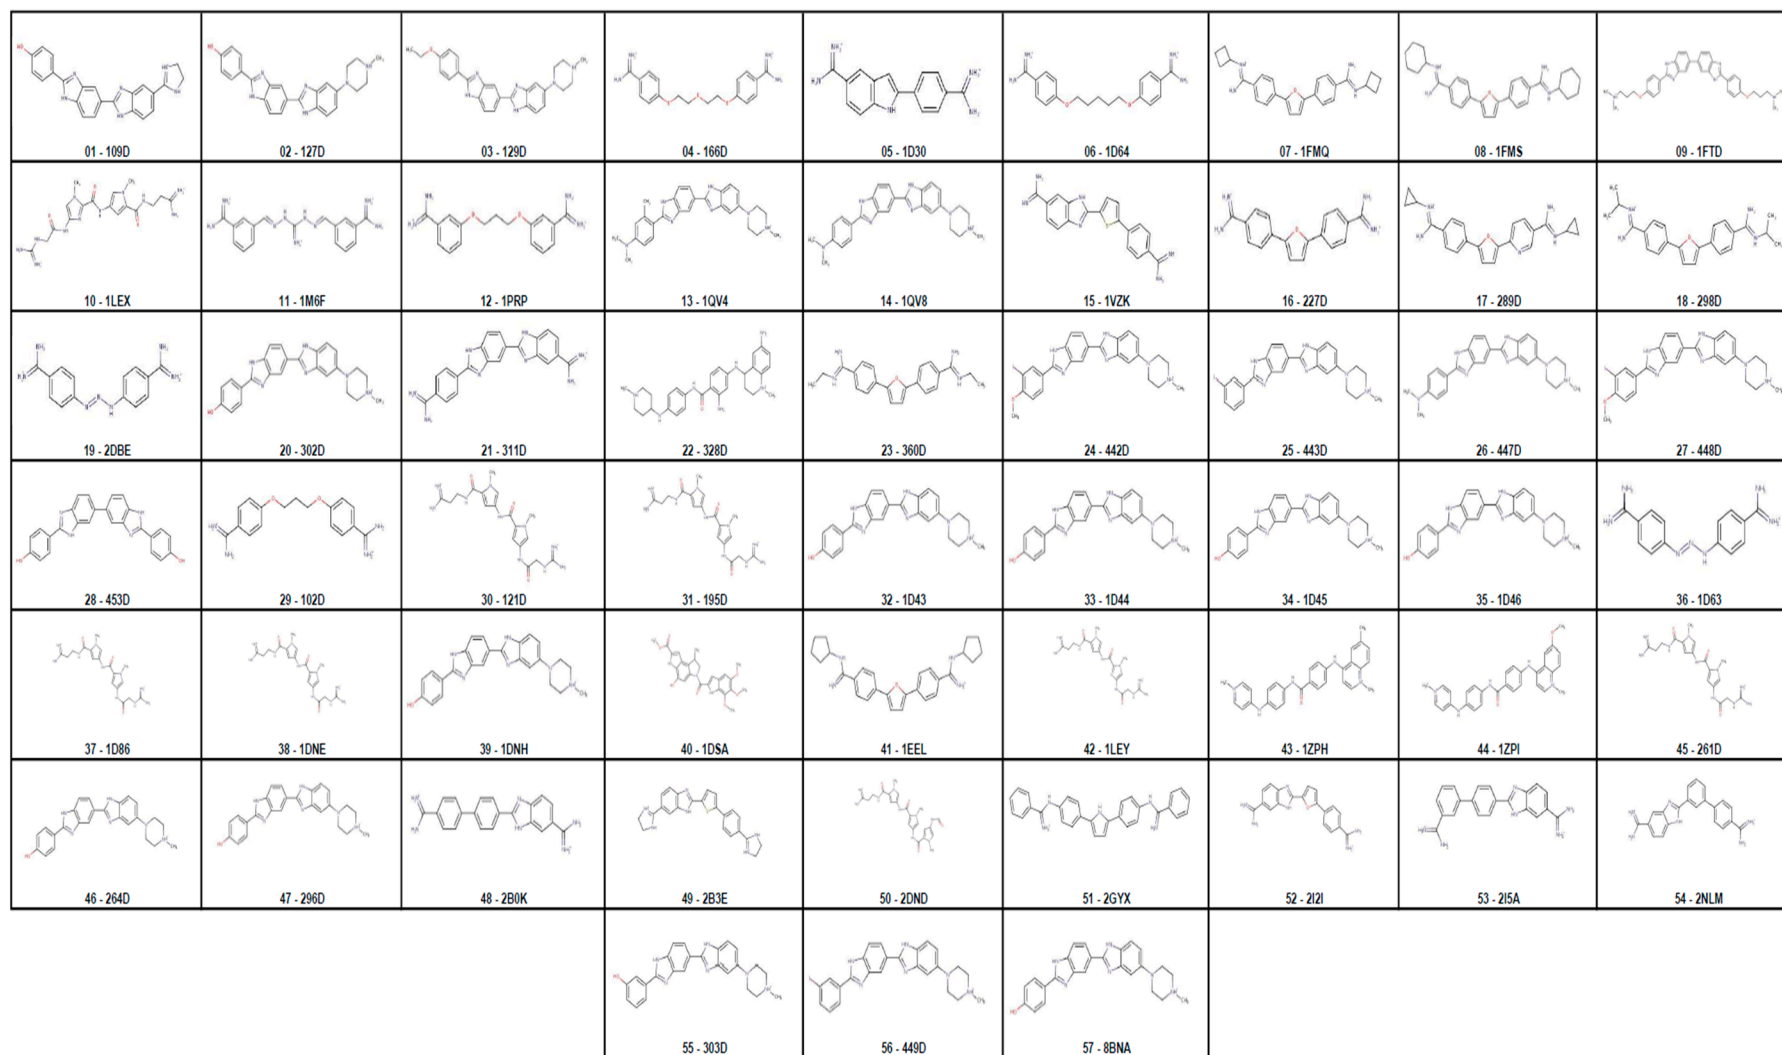

**Figure S1.** Structure of all ligands with their PDB code and docking results values.

**Table S1.** Docking Results with all configurations with energy values in Kcal/mol .

| Ligand    | Vina  | D6A            | CVS             | Position         |
|-----------|-------|----------------|-----------------|------------------|
| 1 - 109D  | -11.9 | 0 <sup>1</sup> | 10 <sup>1</sup> | 56 <sup>th</sup> |
| 2 - 127D  | -11.8 | -36.37         | 3.42            | 20 <sup>th</sup> |
| 3 - 129D  | -11.5 | -38.78         | 3.86            | 31 <sup>st</sup> |
| 4 - 166D  | -7.9  | -50.16         | 6.16            | 49 <sup>th</sup> |
| 5 - 1D30  | -9.3  | -50.43         | 4.94            | 45 <sup>th</sup> |
| 6 - 1D64  | -8    | -51.92         | 6.52            | 52 <sup>nd</sup> |
| 7 - 1FMQ  | -9.6  | -49.79         | 4.09            | 38 <sup>th</sup> |
| 8 - 1FMS  | -9.8  | -52.96         | 4.35            | 40 <sup>th</sup> |
| 9 - 1FTD  | -10.1 | -57.35         | 2.86            | 13 <sup>th</sup> |
| 10 - 1LEX | -10.7 | -59.82         | 3.01            | 17 <sup>h</sup>  |
| 11 - 1M6F | -10   | -56.55         | 3.04            | 18 <sup>th</sup> |
| 12 - 1PRP | -8.2  | -47.43         | 5.9             | 48 <sup>th</sup> |
| 13 - 1QV4 | -12.1 | -41.33         | 2.95            | 15 <sup>th</sup> |
| 14 - 1QV8 | -12.1 | -33.59         | 3.25            | 19 <sup>th</sup> |
| 15 - 1VZK | -10.2 | -52.47         | 3.89            | 33 <sup>rd</sup> |
| 16 - 227D | -8.8  | -51.58         | 5.73            | 47 <sup>th</sup> |
| 17 - 289D | -9.6  | -50.46         | 4.31            | 39 <sup>th</sup> |
| 18 - 298D | -9.4  | -46.15         | 4.57            | 42 <sup>nd</sup> |
| 19 - 2DBE | -8    | -55.02         | 6.69            | 53 <sup>rd</sup> |
| 20 - 302D | -11.2 | -38.54         | 3.85            | 30 <sup>th</sup> |
| 21 - 311D | -10.8 | -52.47         | 3.89            | 10 <sup>th</sup> |
| 22 - 328D | -10.5 | 0 <sup>1</sup> | 10 <sup>1</sup> | 57 <sup>th</sup> |
| 23 - 360D | -9.7  | -49.77         | 4.80            | 44 <sup>th</sup> |
| 24 - 442D | -12   | -39.81         | 2.71            | 8 <sup>th</sup>  |
| 25 - 443D | -12.2 | -35.86         | 2.91            | 14 <sup>th</sup> |
| 26 - 447D | -11.9 | -31.74         | 3.44            | 21 <sup>st</sup> |
| 27 - 448D | -11.9 | -43.28         | 2.83            | 12 <sup>th</sup> |
| 28 - 453D | -12   | -27.33         | 4.09            | 37 <sup>th</sup> |
| 29 - 102D | -8.2  | -50.80         | 6.40            | 51 <sup>st</sup> |
| 30 - 121D | -10.4 | -60.23         | 2.57            | 7 <sup>th</sup>  |
| 31 - 195D | -10.2 | -68.45         | 2.53            | 6 <sup>th</sup>  |
| 32 - 1D43 | -11.9 | -36.64         | 3.64            | 26 <sup>th</sup> |
| 33 - 1D44 | -11.8 | -32.41         | 3.62            | 25 <sup>th</sup> |
| 34 - 1D45 | -11.7 | -31.71         | 3.93            | 34 <sup>th</sup> |
| 35 - 1D46 | -11.9 | -33.60         | 3.52            | 23 <sup>rd</sup> |
| 36 - 1D63 | -8    | -48.05         | 6.19            | 50 <sup>th</sup> |
| 37 - 1D86 | -10.3 | -63.59         | 2.80            | 11 <sup>th</sup> |
| 38 - 1DNE | -9.9  | -54.92         | 2.77            | 9 <sup>th</sup>  |
| 39 - 1DNH | -11.7 | -38.15         | 3.70            | 27 <sup>th</sup> |
| 40 - 1DSA | -9.4  | -5.82          | 8.44            | 54 <sup>th</sup> |
| 41 - 1EEL | -10.2 | -45.08         | 4.03            | 36 <sup>th</sup> |
| 42 - 1LEY | -10.1 | -62.33         | 2.47            | 4 <sup>th</sup>  |
| 43 - 1ZPH | -11.5 | -60.37         | 2.02            | 2 <sup>nd</sup>  |
| 44 - 1ZPI | -12.1 | -59.50         | 2.29            | 3 <sup>rd</sup>  |
| 45 - 261D | -10.6 | -52.65         | 2.52            | 5 <sup>th</sup>  |
| 46 - 264D | -11.8 | -33.99         | 3.79            | 28 <sup>th</sup> |
| 47 - 296D | -11.9 | -35.18         | 3.52            | 22 <sup>nd</sup> |
| 48 - 2B0K | -9.2  | -44.48         | 5.67            | 46 <sup>th</sup> |
| 49 - 2B3E | -12   | -22.02         | 10 <sup>1</sup> | 55 <sup>th</sup> |
| 50 - 2DND | -10.3 | -46.16         | 4.38            | 41 <sup>st</sup> |
| 51 - 2GYX | -11.2 | -62.43         | 1.83            | 1 <sup>st</sup>  |
| 52 - 2I2I | -10.5 | -48.85         | 3.81            | 29 <sup>th</sup> |
| 53 - 2I5A | -10.3 | -51.89         | 3.88            | 32 <sup>nd</sup> |
| 54 - 2NLM | -10.3 | -51.18         | 3.98            | 35 <sup>th</sup> |
| 55 - 303D | -11.2 | -37.47         | 4.59            | 43 <sup>rd</sup> |
| 56 - 449D | -12.2 | -37.59         | 2.97            | 16 <sup>th</sup> |
| 57 - 8BNA | -11.9 | -34.89         | 3.58            | 24 <sup>th</sup> |

<sup>1</sup> Docking error (It was not enabled to anchor the ligand in the receptor).

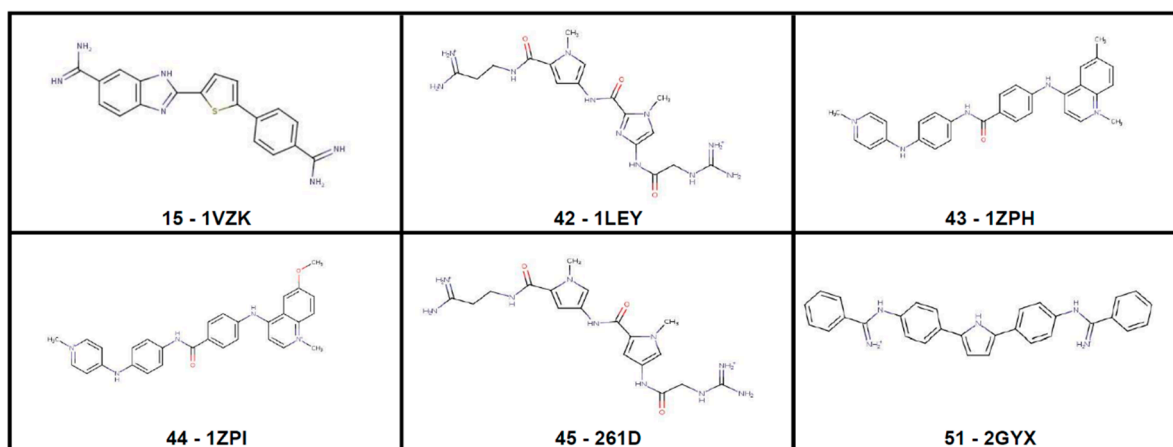

**Figure S2.** Ligands chosen for MD simulations after docking simulation.

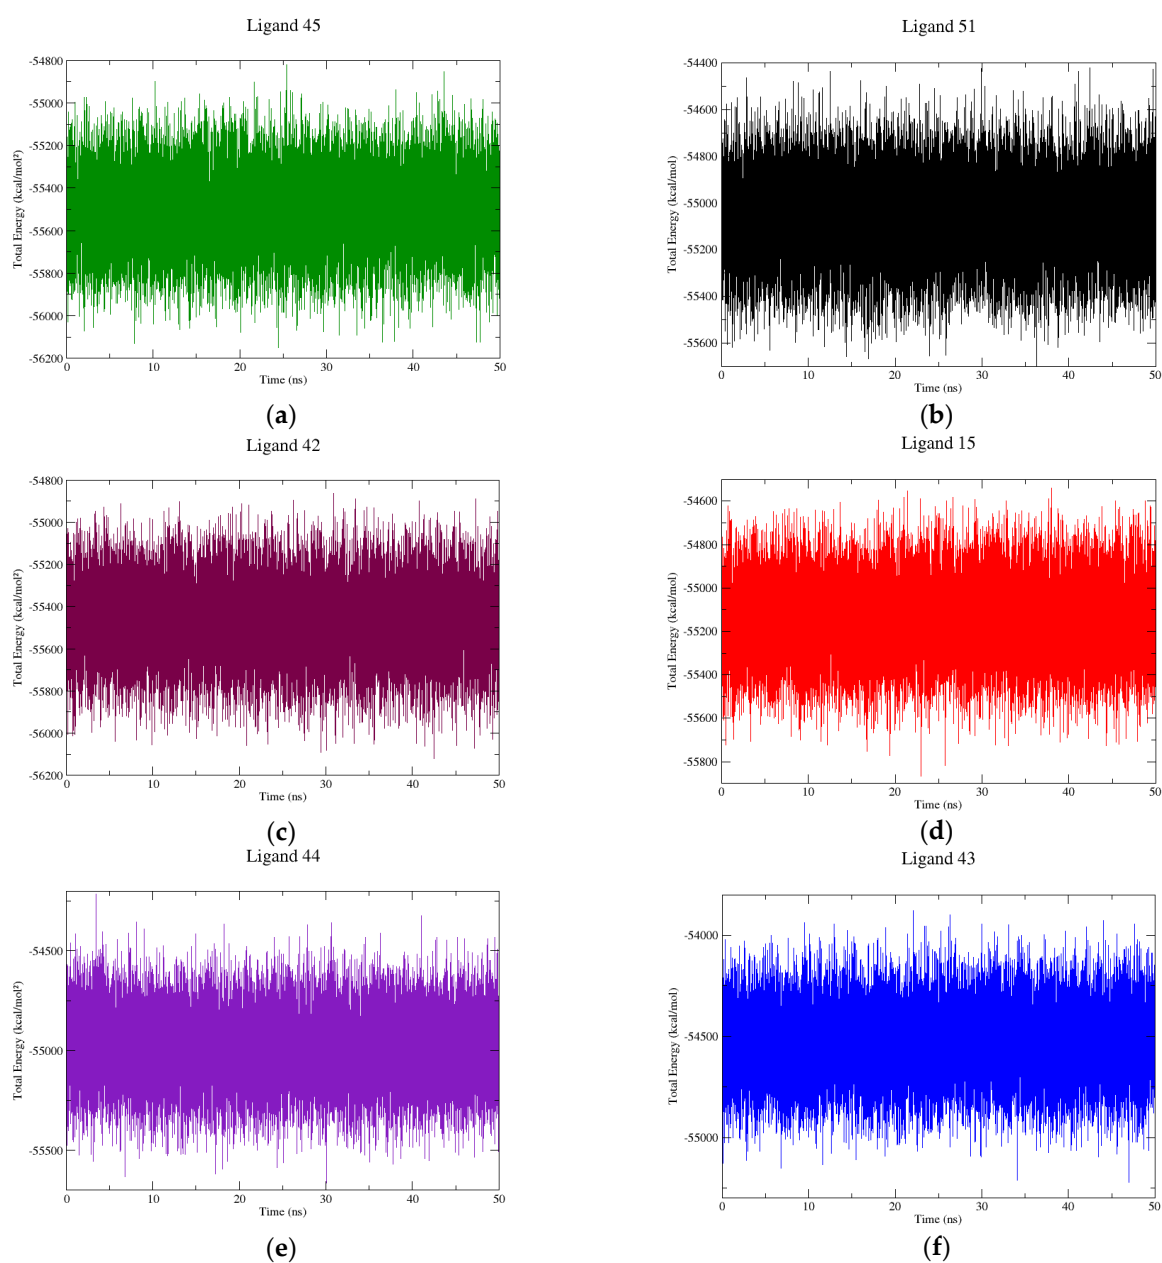

**Figure S3.** Total Energy (Kcal/mol) calculated in Dynamic Molecular Simulator for interactions with DNA and ligands: (a) 45; (b) 51; (c) 42; (d) 15; (e) 44; (f) 43.
